# Supplementary material for: Improving the analysis of composite endpoints in rare disease trials
Source: PubMed Central journal article supplement (PMC5964664; doi:10.1186/s13023-018-0819-1), 2018-05-22
Supplement: 13023_2018_819_MOESM1_ESM.pdf [file 13023_2018_819_MOESM1_ESM.pdf]

Table 1: Type I error of the log-odds ACR50 response in standard binary and augmented binary methods in 5000 sub-samples

| Total sample size | Type I error    |                        |                        | Small sample adjusted type I error |                             |                                 |
|-------------------|-----------------|------------------------|------------------------|------------------------------------|-----------------------------|---------------------------------|
|                   | Standard binary | Augmented binary (GLS) | Augmented binary (GEE) | Standard binary                    | Augmented binary (GLS, PML) | Augmented binary (GEE adj, PML) |
| 30                | 0.005           | 0.059                  | 0.069                  | 0.005                              | 0.054                       | 0.035                           |
| 40                | 0.011           | 0.058                  | 0.068                  | 0.010                              | 0.048                       | 0.040                           |
| 50                | 0.019           | 0.053                  | 0.063                  | 0.014                              | 0.056                       | 0.044                           |
| 60                | 0.025           | 0.055                  | 0.060                  | 0.020                              | 0.052                       | 0.041                           |
| 70                | 0.034           | 0.057                  | 0.059                  | 0.025                              | 0.050                       | 0.044                           |
| 80                | 0.034           | 0.056                  | 0.059                  | 0.029                              | 0.053                       | 0.050                           |

GLS generalised least squares, GEE generalised estimating equations, PML penalised maximum likelihood, GEE adj GEE small sample adjustment

Table 2: Power of the log-odds ACR50 response in standard binary and augmented binary methods in 5000 sub-samples

| Total sample size | Power           |                        |                        | Small sample adjusted power |                                 |                                 |
|-------------------|-----------------|------------------------|------------------------|-----------------------------|---------------------------------|---------------------------------|
|                   | Standard binary | Augmented binary (GLS) | Augmented binary (GEE) | Standard binary             | Augmented binary (GLS with PML) | Augmented binary (GEE adj, PML) |
| 30                | 0.022           | 0.196                  | 0.232                  | 0.034                       | 0.208                           | 0.150                           |
| 40                | 0.061           | 0.263                  | 0.298                  | 0.073                       | 0.265                           | 0.216                           |
| 50                | 0.133           | 0.324                  | 0.359                  | 0.142                       | 0.321                           | 0.279                           |
| 60                | 0.193           | 0.381                  | 0.407                  | 0.207                       | 0.378                           | 0.339                           |
| 70                | 0.269           | 0.436                  | 0.459                  | 0.277                       | 0.433                           | 0.400                           |
| 80                | 0.357           | 0.493                  | 0.512                  | 0.348                       | 0.490                           | 0.460                           |

GLS generalised least squares, GEE generalised estimating equations, PML penalised maximum likelihood, GEE adj GEE small sample adjustment

Table 3: Type I error of the ACR50 difference in response probabilities in standard binary and augmented binary methods in 5000 sub-samples

| Total sample size | Type I error    |                        |                        | Small sample adjusted type I error |                                 |                                |
|-------------------|-----------------|------------------------|------------------------|------------------------------------|---------------------------------|--------------------------------|
|                   | Standard binary | Augmented binary (GLS) | Augmented binary (GEE) | Standard binary                    | Augmented binary (GLS with PML) | Augmented binary (GEE adj,PML) |
| 30                | 0.091           | 0.054                  | 0.065                  | 0.039                              | 0.051                           | 0.031                          |
| 40                | 0.065           | 0.059                  | 0.066                  | 0.045                              | 0.054                           | 0.038                          |
| 50                | 0.067           | 0.055                  | 0.061                  | 0.042                              | 0.054                           | 0.035                          |
| 60                | 0.055           | 0.061                  | 0.062                  | 0.047                              | 0.052                           | 0.046                          |
| 70                | 0.054           | 0.051                  | 0.060                  | 0.051                              | 0.053                           | 0.044                          |
| 80                | 0.064           | 0.049                  | 0.061                  | 0.045                              | 0.058                           | 0.044                          |

GLS generalised least squares, GEE generalised estimating equations, PML penalised maximum likelihood, GEE adj GEE small sample adjustment

Table 4: Power of the ACR50 difference in response probabilities in standard binary and augmented binary methods in 5000 sub-samples

| Total sample size | Power           |                        |                        | Small sample adjusted power |                                 |                                 |
|-------------------|-----------------|------------------------|------------------------|-----------------------------|---------------------------------|---------------------------------|
|                   | Standard binary | Augmented binary (GLS) | Augmented binary (GEE) | Standard binary             | Augmented binary (GLS with PML) | Augmented binary (GEE adj, PML) |
| 30                | 0.243           | 0.202                  | 0.208                  | 0.157                       | 0.211                           | 0.133                           |
| 40                | 0.273           | 0.270                  | 0.284                  | 0.224                       | 0.272                           | 0.199                           |
| 50                | 0.318           | 0.334                  | 0.344                  | 0.274                       | 0.329                           | 0.264                           |
| 60                | 0.363           | 0.395                  | 0.394                  | 0.314                       | 0.385                           | 0.324                           |
| 70                | 0.415           | 0.441                  | 0.444                  | 0.370                       | 0.436                           | 0.387                           |
| 80                | 0.474           | 0.500                  | 0.498                  | 0.432                       | 0.496                           | 0.446                           |

GLS generalised least squares, GEE generalised estimating equations, PML penalised maximum likelihood, GEE adj GEE small sample adjustment

Table 5: Type I error of the log-odds ACR70 response in standard binary and augmented binary methods in 5000 sub-samples

| Total sample size | Type I error    |                        |                        | Small sample adjusted type I error |                                 |                                 |
|-------------------|-----------------|------------------------|------------------------|------------------------------------|---------------------------------|---------------------------------|
|                   | Standard binary | Augmented binary (GLS) | Augmented binary (GEE) | Standard binary                    | Augmented binary (GLS with PML) | Augmented binary (GEE with PML) |
| 30                | 0.000           | 0.063                  | 0.074                  | 0.000                              | 0.056                           | 0.036                           |
| 40                | 0.000           | 0.061                  | 0.068                  | 0.000                              | 0.054                           | 0.041                           |
| 50                | 0.000           | 0.052                  | 0.071                  | 0.000                              | 0.058                           | 0.045                           |
| 60                | 0.000           | 0.056                  | 0.064                  | 0.000                              | 0.058                           | 0.038                           |
| 70                | 0.000           | 0.048                  | 0.058                  | 0.002                              | 0.058                           | 0.046                           |
| 80                | 0.002           | 0.055                  | 0.055                  | 0.002                              | 0.053                           | 0.046                           |

GLS generalised least squares, GEE generalised estimating equations, PML penalised maximum likelihood, GEE adj GEE small sample adjustment

Table 6: Power of the log-odds ACR70 response in standard binary and augmented binary methods in 5000 sub-samples

| Total sample size | Power           |                        |                        | Small sample adjusted power |                                 |                                 |
|-------------------|-----------------|------------------------|------------------------|-----------------------------|---------------------------------|---------------------------------|
|                   | Standard binary | Augmented binary (GLS) | Augmented binary (GEE) | Standard binary             | Augmented binary (GLS with PML) | Augmented binary (GEE with PML) |
| 30                | 0.000           | 0.191                  | 0.229                  | 0.000                       | 0.205                           | 0.142                           |
| 40                | 0.000           | 0.247                  | 0.284                  | 0.000                       | 0.253                           | 0.199                           |
| 50                | 0.001           | 0.307                  | 0.340                  | 0.004                       | 0.308                           | 0.258                           |
| 60                | 0.003           | 0.352                  | 0.378                  | 0.007                       | 0.350                           | 0.312                           |
| 70                | 0.007           | 0.411                  | 0.433                  | 0.021                       | 0.411                           | 0.370                           |
| 80                | 0.015           | 0.460                  | 0.478                  | 0.036                       | 0.460                           | 0.424                           |

GLS generalised least squares, GEE generalised estimating equations, PML penalised maximum likelihood, GEE adj GEE small sample adjustment

Table 7: Type I error of the ACR70 difference in response probabilities in standard binary and augmented binary methods in 5000 sub-samples

| Total sample size | Type I error    |                        |                        | Small sample adjusted type I error |                                 |                                 |
|-------------------|-----------------|------------------------|------------------------|------------------------------------|---------------------------------|---------------------------------|
|                   | Standard binary | Augmented binary (GLS) | Augmented binary (GEE) | Standard binary                    | Augmented binary (GLS with PML) | Augmented binary (GEE with PML) |
| 30                | 0.056           | 0.029                  | 0.031                  | 0.006                              | 0.030                           | 0.008                           |
| 40                | 0.040           | 0.032                  | 0.039                  | 0.013                              | 0.034                           | 0.010                           |
| 50                | 0.032           | 0.031                  | 0.037                  | 0.020                              | 0.034                           | 0.015                           |
| 60                | 0.041           | 0.034                  | 0.041                  | 0.022                              | 0.036                           | 0.022                           |
| 70                | 0.049           | 0.040                  | 0.040                  | 0.020                              | 0.045                           | 0.025                           |
| 80                | 0.048           | 0.045                  | 0.039                  | 0.026                              | 0.040                           | 0.031                           |

GLS generalised least squares, GEE generalised estimating equations, PML penalised maximum likelihood, GEE adj GEE small sample adjustment

Table 8: Power of the ACR70 difference in response probabilities in standard binary and augmented binary methods in 5000 sub-samples

| Total sample size | Power           |                        |                        | Small sample adjusted power |                                 |                                 |
|-------------------|-----------------|------------------------|------------------------|-----------------------------|---------------------------------|---------------------------------|
|                   | Standard binary | Augmented binary (GLS) | Augmented binary (GEE) | Standard binary             | Augmented binary (GLS with PML) | Augmented binary (GEE with PML) |
| 30                | 0.108           | 0.118                  | 0.110                  | 0.029                       | 0.120                           | 0.034                           |
| 40                | 0.112           | 0.173                  | 0.165                  | 0.065                       | 0.174                           | 0.077                           |
| 50                | 0.136           | 0.243                  | 0.228                  | 0.095                       | 0.240                           | 0.140                           |
| 60                | 0.185           | 0.304                  | 0.281                  | 0.128                       | 0.301                           | 0.206                           |
| 70                | 0.250           | 0.366                  | 0.345                  | 0.156                       | 0.363                           | 0.269                           |
| 80                | 0.288           | 0.417                  | 0.399                  | 0.184                       | 0.415                           | 0.331                           |

GLS generalised least squares, GEE generalised estimating equations, PML penalised maximum likelihood, GEE adj GEE small sample adjustment
