# Supplementary material for: Improving the analysis of composite endpoints in rare disease trials
Source: PubMed Central journal article supplement (PMC5964664; doi:10.1186/s13023-018-0819-1), 2018-05-22
Supplement: 13023_2018_819_MOESM2_ESM.pdf [file 13023_2018_819_MOESM2_ESM.pdf]

## MODELS AND SMALL SAMPLE ADJUSTMENTS

### NOTATION

Suppose we have  $i$  patients, with  $i \in \{1, \dots, n\}$ . Let  $T_i \in \{1, 2\}$  indicate the treatment arm of patient  $i$ . The baseline ACR-N score is  $y_{i0}$ , with  $Y_{i1}$ ,  $Y_{i2}$  denoting the continuous ACR-N scores at the week 12 visit and week 24 visit respectively.  $F_{i1}$  is an indicator variable taking a value equal to 1 if the patient discontinues treatment or requires rescue medication before the week 12 visit.  $F_{i2}$  is the corresponding indicator for the period between the week 12 and week 24 visit.  $S_i$  is then a binary variable indicating whether or not patient  $i$  was a responder. For the ACR20 endpoint,  $S_i = 1$  if  $Y_{i2} \geq 20$  and  $F_{i1} = F_{i2} = 0$ .

### STANDARD BINARY METHOD

The standard binary method is a logistic regression on the binary indicator  $S_i$ .

$$\text{logit}(P(S_i = 1 | T_i, y_{i0})) = \alpha + \beta T_i + \gamma y_{i0} \quad (1)$$

This provides us with maximum likelihood estimates  $\hat{\theta}_{SB} = \{\alpha, \beta, \gamma\}$  and  $\text{Cov}(\hat{\theta}_{SB})$ . From this we can obtain a fitted probability of response for each patient  $i$  as if they were treated with the experimental treatment  $\tilde{p}_{i1}$  and the control treatment  $\tilde{p}_{i0}$ .

From this we can then construct various quantities of interest:

#### 1. Difference in Response Probabilities

$$\tilde{\delta}_1 = \frac{\sum_{i=1}^n \tilde{p}_{i1} - \sum_{i=1}^n \tilde{p}_{i0}}{n} \quad (2)$$

#### 2. Risk ratio

$$\tilde{\delta}_2 = \frac{\sum_{i=1}^n \tilde{p}_{i1}}{\sum_{i=1}^n \tilde{p}_{i0}} \quad (3)$$

#### 3. Odds ratio

$$\tilde{\delta}_3 = \frac{\left( \frac{\sum_{i=1}^n \tilde{p}_{i1}}{n - \sum_{i=1}^n \tilde{p}_{i1}} \right)}{\left( \frac{\sum_{i=1}^n \tilde{p}_{i0}}{n - \sum_{i=1}^n \tilde{p}_{i0}} \right)} \quad (4)$$

Confidence intervals for these treatment effect estimates can be constructed by obtaining standard error estimates through the delta method. This requires the covariance matrix of the maximum likelihood estimates  $\text{Cov}(\hat{\theta}_{SB})$  and the vector of partial derivatives of  $\tilde{\delta}$  with respect to each of the parameter estimates, " $\tilde{\delta}$ ".

For example, the variance of  $\tilde{\delta}_1$ :

$$\text{Var}(\tilde{\delta}_1) = (\tilde{\delta}_1)^T \text{Cov}(\hat{\theta}_{SB}) (\tilde{\delta}_1) \quad (5)$$

## AUGMENTED BINARY METHOD

The augmented binary method models the joint distribution of  $(Y_1, Y_2, F_1, F_2)|T, Y_0$  by employing factorisation techniques to model each of the components separately, as shown by the equations below.

$$Y_{ij} = \alpha + \beta_1 T_i I\{j = 1\} + \beta_2 T_i I\{j = 2\} + \gamma y_{i0} + \delta_j + \varepsilon_{ij}$$

$$(\varepsilon_{i1}, \varepsilon_{i2} | T_i, y_{i0}) \sim N\left((0, 0), \begin{bmatrix} \sigma_1^2 & \rho\sigma_1\sigma_2 \\ \rho\sigma_1\sigma_2 & \sigma_2^2 \end{bmatrix}\right) \quad (6)$$

$$\text{logit}(P(F_{i1} = 1 | T_i, y_{i0}, Y_{i1}, Y_{i2})) = \alpha_{F1} + \beta_{F1} T_i + \gamma_{F1} y_{i0} \quad (7)$$

$$\text{logit}(P(F_{i2} = 1 | F_{i1} = 0, T_i, y_{i0}, Y_{i1}, Y_{i2})) = \alpha_{F2} + \beta_{F2} T_i + \gamma_{F2} Y_{i1} \quad (8)$$

We fit repeated measures models using both generalised least squares (GLS) and generalised estimating equations (GEE) to the continuous component. GLS estimates the variance-covariance matrix using restricted maximum likelihood methods and GEE makes use of robust variance estimation techniques.

After fitting these models and obtaining maximum likelihood estimates  $\hat{\theta}_{AB} = \{\hat{\alpha}, \hat{\beta}_1, \hat{\beta}_2, \hat{\gamma}, \hat{\delta}_1, \hat{\delta}_2, \hat{\alpha}_{F1}, \hat{\beta}_{F1}, \hat{\gamma}_{F1}, \hat{\alpha}_{F2}, \hat{\beta}_{F2}, \hat{\gamma}_{F2}\}$ , we can obtain the overall probability in response in each arm. For patient  $i$ , the probability of response in the ACR20 endpoint is:

$$\begin{aligned} & P(Y_{i2} \geq 20, F_{i1} = F_{i2} = 0 | T_i, y_{i0}) \\ &= \int_{-\infty}^{\infty} \int_{-\infty}^{\infty} P(Y_{i2} \geq 20, F_{i1} = F_{i2} = 0 | T_i, y_{i0}, Y_{i1} = y_{i1}, Y_{i2} = y_{i2}) f_{y_{i1}, y_{i2}}(y_{i1}, y_{i2}; T_i, y_{i0}) dy_{i2} dy_{i1} \\ &= \int_{-\infty}^{\infty} \int_{-\infty}^{20} P(F_{i1} = F_{i2} = 0 | T_i, y_{i0}, Y_{i1} = y_{i1}, Y_{i2} = y_{i2}) f_{y_{i1}, y_{i2}}(y_{i1}, y_{i2}; T_i, y_{i0}) dy_{i2} dy_{i1} \\ &= \int_{-\infty}^{\infty} \int_{-\infty}^{20} P(F_{i2} = 0 | F_{i1} = 0, T_i, y_{i0}, Y_{i1} = y_{i1}) P(F_{i1} = 0 | T_i, y_{i0}, Y_{i1} = y_{i1}) f_{y_{i1}, y_{i2}}(y_{i1}, y_{i2}; T_i, y_{i0}) dy_{i2} dy_{i1} \end{aligned}$$

Again, we can obtain a fitted probability of response for each patient  $i$  as if they were treated with the experimental treatment  $\tilde{p}_{i1}$  and the control treatment  $\tilde{p}_{i0}$ . Treatment effect estimates and confidence intervals are constructed as before, where  $\text{Cov}(\hat{\theta}_{AB})$  is as shown in equation (9).

$$\text{Cov}(\hat{\theta}_{AB}) = \begin{pmatrix} \text{Cov}(\hat{\alpha}, \hat{\beta}_1, \hat{\beta}_2, \hat{\gamma}, \hat{\delta}_1, \hat{\delta}_2) & 0 & 0 \\ 0 & \text{Cov}(\hat{\alpha}_{F1}, \hat{\beta}_{F1}, \hat{\gamma}_{F1}) & 0 \\ 0 & 0 & \text{Cov}(\hat{\alpha}_{F2}, \hat{\beta}_{F2}, \hat{\gamma}_{F2}) \end{pmatrix} \quad (9)$$

## BINARY COMPONENT ADJUSTMENT

The penalised likelihood is shown below, where  $L(\theta)$  is the usual likelihood function for a logit model and  $I(\theta)$  is the information matrix.

$$L^*(\theta) = L(\theta)|I(\theta)|^{\frac{1}{2}} \quad (10)$$

## CONTINUOUS COMPONENT ADJUSTMENT

The standard robust sandwich covariance estimator is shown in equation 11.

$$V_{sandwich} = (\sum_{i=1}^n D_i V_i^{-1} D_i)^{-1} (\sum_{i=1}^n D_i V_i^{-1} Cov(\hat{Y}_i) V_i^{-1} D_i) (\sum_{i=1}^n D_i V_i^{-1} D_i)^{-1} \quad (11)$$

where:

$$D_i = \frac{\partial \mu_i}{\partial \beta}$$

$\mu_i$  is the vector of mean responses

$\beta$  the parameter vector

$V_i$  is the working variance-covariance matrix for  $Y_i$

$$Cov(\hat{Y}_i) = (Y_i - \hat{\mu}_i)(Y_i - \hat{\mu}_i)'$$

The small sample adjusted variance estimator is shown in equation 12.

$$V_{MBN} = (\sum_{i=1}^n D_i V_i^{-1} D_i)^{-1} (\sum_{i=1}^n D_i V_i^{-1} (kCov(\hat{Y}_i) + \delta_m \xi V_i) V_i^{-1} D_i) (\sum_{i=1}^n D_i V_i^{-1} D_i)^{-1} \quad (12)$$

where:

$$k = \frac{N-1}{N-p} \frac{n}{n-1}$$

$p$  is the number of parameters

$N$  is the total number of observations

$$\delta_m = \begin{cases} \frac{p}{n-p}, & \text{if } n > 3p \\ \frac{1}{2}, & \text{otherwise} \end{cases}$$

$$\xi = \max \left( 1, \frac{\text{trace} \left( (\sum_{i=1}^n D_i V_i^{-1} D_i)^{-1} (\sum_{i=1}^n D_i V_i^{-1} Cov(Y_i) V_i^{-1} D_i) \right)}{p} \right)$$
