# Supplementary material for: Improving the analysis of composite endpoints in rare disease trials
Source: PubMed Central journal article supplement (PMC5964664; doi:10.1186/s13023-018-0819-1), 2018-05-22
Supplement: 13023_2018_819_MOESM4_ESM.pdf [file 13023_2018_819_MOESM4_ESM.pdf]

## SIMULATED EXAMPLE

### NOTATION

Suppose we have  $i$  patients, with  $i \in \{1, \dots, n\}$ . Let  $T_i \in \{1, 2\}$  indicate the treatment arm of patient  $i$ . The baseline ACR-N score is  $y_{i0}$ , with  $Y_{i1}$ ,  $Y_{i2}$  denoting the continuous ACR-N scores at the week 12 visit and week 24 visit respectively.  $F_{i1}$  is an indicator variable taking a value equal to 1 if the patient discontinues treatment or requires rescue medication before the week 12 visit.  $F_{i2}$  is the corresponding indicator for the period between the week 12 and week 24 visit.  $S_i$  is then a binary variable indicating whether or not patient  $i$  was a responder. For the ACR20 endpoint,  $S_i = 1$  if  $Y_{i2} \geq 20$  and  $F_{i1} = F_{i2} = 0$ .

### MODEL

$$Y_{ij} = \alpha + \beta_1 T_i I\{j = 1\} + \beta_2 T_i I\{j = 2\} + \gamma y_{i0} + \delta_j + \varepsilon_{ij}$$

$$(\varepsilon_{i1}, \varepsilon_{i2} | T_i, y_{i0}) \sim N\left((0, 0), \begin{bmatrix} \sigma_1^2 & \rho\sigma_1\sigma_2 \\ \rho\sigma_1\sigma_2 & \sigma_2^2 \end{bmatrix}\right) \quad (1)$$

$$\text{logit}(P(F_{i1} = 1 | T_i, y_{i0}, Y_{i1}, Y_{i2})) = \alpha_{F1} + \beta_{F1} T_i + \gamma_{F1} y_{i0} \quad (2)$$

$$\text{logit}(P(F_{i2} = 1 | F_{i1} = 0, T_i, y_{i0}, Y_{i1}, Y_{i2})) = \alpha_{F2} + \beta_{F2} T_i + \gamma_{F2} Y_{i1} \quad (3)$$

where  $y_{i0} \sim N(5.8, 0.8)$  as in the OSKIRA-1 trial.

We investigate the power and type I error rate for the small sample adjusted measures for the difference in response probability estimator, as shown below.

$$\tilde{\delta}_1 = \frac{\sum_{i=1}^n \tilde{p}_{i1} - \sum_{i=1}^n \tilde{p}_{i0}}{n} \quad (4)$$

where  $\tilde{p}_{i1}$  and  $\tilde{p}_{i0}$  are the fitted probabilities of response for patient  $i$  on the experimental treatment and the control treatment respectively.

## RESULTS

Table 1: Power and average confidence interval width in ACR20 response in the small sample adjusted standard binary and augmented binary methods in 5000 simulations

| Total sample size | $\tilde{\delta}_1$ (S.D.) |               | Power |         | Average CI width |         | Sample size reduction (%) |
|-------------------|---------------------------|---------------|-------|---------|------------------|---------|---------------------------|
|                   | Bin                       | Aug bin       | Bin   | Aug bin | Bin              | Aug bin |                           |
| 30                | 0.128 (0.167)             | 0.130 (0.121) | 0.145 | 0.172   | 0.630            | 0.496   | 38.0                      |
| 40                | 0.132 (0.145)             | 0.133 (0.106) | 0.179 | 0.226   | 0.550            | 0.431   | 38.6                      |
| 50                | 0.138 (0.129)             | 0.135 (0.097) | 0.213 | 0.278   | 0.493            | 0.386   | 38.7                      |
| 60                | 0.137 (0.120)             | 0.136 (0.088) | 0.240 | 0.329   | 0.452            | 0.353   | 39.0                      |
| 70                | 0.135 (0.113)             | 0.136 (0.083) | 0.269 | 0.367   | 0.419            | 0.328   | 38.7                      |
| 80                | 0.138 (0.103)             | 0.138 (0.077) | 0.293 | 0.425   | 0.392            | 0.306   | 39.1                      |

$\alpha = -15, \beta_1 = 2.5, \beta_2 = 2, \gamma = 4.1, \delta_1 = 6, \delta_2 = 12, \sigma_1 = 1, \sigma_2 = 1, \rho = 0.6, \alpha_{F1} = -3.8, \beta_{F1} = -0.1, \gamma_{F1} = 0.4, \alpha_{F2} = -0.8, \beta_{F2} = -0.08, \gamma_{F2} = -0.008, \tilde{\delta}_1 \approx 0.134$

Table 2: Type I error rate and average confidence interval width in ACR20 response in the small sample adjusted standard binary and augmented binary methods in 5000 simulations

| Total sample size | $\tilde{\delta}_1$ (S.D.) |                | Type I error |         | Average CI width |         |
|-------------------|---------------------------|----------------|--------------|---------|------------------|---------|
|                   | Bin                       | Aug bin        | Bin          | Aug bin | Bin              | Aug bin |
| 30                | 0.002 (0.157)             | 0.001 (0.102)  | 0.068        | 0.047   | 0.596            | 0.426   |
| 40                | -0.001 (0.143)            | 0.001 (0.092)  | 0.080        | 0.047   | 0.517            | 0.370   |
| 50                | 0.000 (0.128)             | -0.002 (0.081) | 0.081        | 0.044   | 0.465            | 0.332   |
| 60                | -0.001 (0.118)            | 0.000 (0.075)  | 0.079        | 0.043   | 0.425            | 0.303   |
| 70                | -0.001 (0.107)            | 0.000 (0.070)  | 0.073        | 0.043   | 0.394            | 0.282   |
| 80                | 0.000 (0.104)             | 0.000 (0.065)  | 0.081        | 0.049   | 0.369            | 0.263   |

$\alpha = -15, \beta_1 = 0, \beta_2 = 0, \gamma = 4.1, \delta_1 = 6, \delta_2 = 12, \sigma_1 = 1, \sigma_2 = 1, \rho = 0.6, \alpha_{F1} = -3.8, \beta_{F1} = 0, \gamma_{F1} = 0.4, \alpha_{F2} = -0.8, \beta_{F2} = 0, \gamma_{F2} = -0.008, \tilde{\delta}_1 = 0$
