# Supplementary material for: Improving the analysis of composite endpoints in rare disease trials
Source: PubMed Central journal article supplement (PMC5964664; doi:10.1186/s13023-018-0819-1), 2018-05-22
Supplement: 13023_2018_819_MOESM5_ESM.pdf [file 13023_2018_819_MOESM5_ESM.pdf]

Table 1: Median width (S.D.) of confidence intervals of the standard binary and augmented binary methods for the log-odds treatment effect

| N  | Standard binary |               | Augmented binary (GLS) |               | Augmented binary (GEE) |               |
|----|-----------------|---------------|------------------------|---------------|------------------------|---------------|
|    | Unadjusted      | Adjusted      | Unadjusted             | Adjusted      | Unadjusted             | Adjusted      |
| 30 | 3.019 (431.8)   | 3.000 (0.236) | 2.509 (1390)           | 2.477 (0.212) | 2.458 (1413.6)         | 2.739 (0.384) |
| 40 | 2.602 (136.7)   | 2.592 (0.163) | 2.155 (170.4)          | 2.145 (0.150) | 2.134 (183.2)          | 2.325 (0.175) |
| 50 | 2.320 (0.135)   | 2.314 (0.112) | 1.924 (61.75)          | 1.919 (0.117) | 1.916 (81.20)          | 2.053 (0.123) |
| 60 | 2.117 (0.103)   | 2.112 (0.089) | 1.755 (16.656)         | 1.753 (0.096) | 1.755 (22.07)          | 1.861 (0.099) |
| 70 | 1.959 (0.081)   | 1.954 (0.072) | 1.624 (0.588)          | 1.862 (0.218) | 1.630 (1.318)          | 1.712 (0.081) |
| 80 | 1.832 (0.069)   | 1.828 (0.063) | 1.521 (0.071)          | 1.378 (0.129) | 1.531 (0.066)          | 1.598 (0.069) |

Results shown on logarithmic scale

GLS generalised least squares, GEE generalised estimating equations

Table 2: Median width (S.D.) of confidence intervals of the standard binary and augmented binary methods for the difference in response probabilities treatment effect

| N  | Standard binary |               | Augmented binary (GLS) |               | Augmented binary (GEE) |               |
|----|-----------------|---------------|------------------------|---------------|------------------------|---------------|
|    | Unadjusted      | Adjusted      | Unadjusted             | Adjusted      | Unadjusted             | Adjusted      |
| 30 | 0.675 (0.044)   | 0.686 (0.037) | 0.567 (248.8)          | 0.554 (0.045) | 0.554 (245.1)          | 0.614 (0.142) |
| 40 | 0.592 (0.030)   | 0.597 (0.026) | 0.492 (36.558)         | 0.464 (0.062) | 0.488 (39.049)         | 0.528 (0.062) |
| 50 | 0.536 (0.023)   | 0.539 (0.021) | 0.442 (14.154)         | 0.470 (0.059) | 0.442 (18.558)         | 0.472 (0.033) |
| 60 | 0.490 (0.018)   | 0.492 (0.017) | 0.406 (3.985)          | 0.403 (0.021) | 0.407 (5.229)          | 0.429 (0.024) |
| 70 | 0.455 (0.015)   | 0.456 (0.014) | 0.377 (0.142)          | 0.375 (0.018) | 0.379 (0.319)          | 0.396 (0.020) |
| 80 | 0.426 (0.013)   | 0.428 (0.012) | 0.354 (0.016)          | 0.351 (0.016) | 0.357 (0.017)          | 0.371 (0.017) |

Results shown on probability scale

GLS generalised least squares, GEE generalised estimating equations

Table 3: Average treatment effect (S.D.) in subsamples using the standard binary and augmented binary methods for the log-odds treatment effect

| N  | Standard binary |               | Augmented binary (GLS) |               | Augmented binary (GEE) |               |
|----|-----------------|---------------|------------------------|---------------|------------------------|---------------|
|    | Unadjusted      | Adjusted      | Unadjusted             | Adjusted      | Unadjusted             | Adjusted      |
| 30 | 0.606 (1.096)   | 0.526 (0.737) | 0.783 (0.649)          | 0.747 (0.619) | 0.812 (0.678)          | 0.773 (0.646) |
| 40 | 0.595 (0.745)   | 0.543 (0.634) | 0.794 (0.544)          | 0.765 (0.525) | 0.828 (0.565)          | 0.796 (0.545) |
| 50 | 0.572 (0.587)   | 0.536 (0.547) | 0.790 (0.478)          | 0.767 (0.465) | 0.821 (0.495)          | 0.795 (0.480) |
| 60 | 0.570 (0.541)   | 0.540 (0.510) | 0.788 (0.435)          | 0.770 (0.425) | 0.816 (0.449)          | 0.795 (0.438) |
| 70 | 0.577 (0.476)   | 0.551 (0.453) | 0.794 (0.394)          | 0.902 (0.456) | 0.821 (0.406)          | 0.802 (0.398) |
| 80 | 0.568 (0.455)   | 0.546 (0.436) | 0.790 (0.367)          | 0.707 (0.333) | 0.817 (0.377)          | 0.801 (0.370) |

Results shown on logarithmic scale

GLS generalised least squares, GEE generalised estimating equations

Table 4: Average treatment effect (S.D.) in subsamples using the standard binary and augmented binary methods for the difference in response probabilities treatment effect

| N  | Standard binary |               | Augmented binary (GLS) |               | Augmented binary (GEE) |               |
|----|-----------------|---------------|------------------------|---------------|------------------------|---------------|
|    | Unadjusted      | Adjusted      | Unadjusted             | Adjusted      | Unadjusted             | Adjusted      |
| 30 | 0.129 (0.178)   | 0.118 (0.163) | 0.180 (0.145)          | 0.170 (0.137) | 0.179 (0.153)          | 0.168 (0.143) |
| 40 | 0.133 (0.153)   | 0.124 (0.142) | 0.185 (0.124)          | 0.171 (0.116) | 0.191 (0.128)          | 0.182 (0.123) |
| 50 | 0.131 (0.132)   | 0.124 (0.125) | 0.186 (0.110)          | 0.195 (0.117) | 0.193 (0.113)          | 0.185 (0.109) |
| 60 | 0.131 (0.123)   | 0.125 (0.117) | 0.187 (0.101)          | 0.181 (0.098) | 0.193 (0.104)          | 0.186 (0.100) |
| 70 | 0.134 (0.109)   | 0.129 (0.104) | 0.189 (0.091)          | 0.184 (0.089) | 0.195 (0.094)          | 0.190 (0.091) |
| 80 | 0.133 (0.104)   | 0.128 (0.101) | 0.189 (0.085)          | 0.184 (0.083) | 0.195 (0.087)          | 0.190 (0.085) |

Results shown on probability scale

GLS generalised least squares, GEE generalised estimating equations

Table 5: Average treatment effect (S.D.) in permuted subsamples using the standard binary and augmented binary methods for the log-odds treatment effect

| N  | Standard binary |                | Augmented binary (GLS) |                | Augmented binary (GEE) |                |
|----|-----------------|----------------|------------------------|----------------|------------------------|----------------|
|    | Unadjusted      | Adjusted       | Unadjusted             | Adjusted       | Unadjusted             | Adjusted       |
| 30 | 0.011 (1.171)   | 0.005 (0.742)  | 0.001 (0.665)          | 0.049 (0.641)  | -0.002 ( 0.673)        | -0.002 (0.646) |
| 40 | 0.012 (0.755)   | 0.006 (0.645)  | -0.005 (0.559)         | 0.000 (0.537)  | 0.014 (0.583)          | 0.002 (0.555)  |
| 50 | 0.000 (0.608)   | 0.004 (0.575)  | 0.007 (0.487)          | -0.003 (0.475) | -0.003 (0.512)         | 0.012 (0.492)  |
| 60 | -0.005 (0.557)  | 0.004 (0.527)  | -0.003 (0.449)         | 0.000 (0.437)  | -0.004 (0.461)         | -0.005 (0.452) |
| 70 | -0.004 (0.507)  | 0.001 (0.411)  | 0.004 (0.413)          | 0.000 (0.487)  | -0.004 (0.424)         | -0.007 (0.417) |
| 80 | 0.005 (0.467)   | -0.009 (0.457) | 0.005 (0.390)          | -0.002 (0.354) | 0.000 (0.401)          | -0.001 (0.386) |

Results shown on logarithmic scale

GLS generalised least squares, GEE generalised estimating equations

Table 6: Average treatment effect (S.D.) in permuted subsamples using the standard binary and augmented binary methods for the difference in response probabilities treatment effect

| N  | Standard binary |                | Augmented binary (GLS) |                | Augmented binary (GEE) |                |
|----|-----------------|----------------|------------------------|----------------|------------------------|----------------|
|    | Unadjusted      | Adjusted       | Unadjusted             | Adjusted       | Unadjusted             | Adjusted       |
| 30 | -0.003 (0.182)  | -0.002 (0.166) | 0.001 (0.151)          | 0.000 (0.144)  | -0.002 (0.154)         | 0.000 (0.145)  |
| 40 | 0.001 (0.156)   | 0.000 (0.148)  | 0.001 (0.130)          | -0.002 (0.123) | -0.004 (0.136)         | 0.000 (0.130)  |
| 50 | -0.001 (0.142)  | -0.002 (0.134) | 0.002 (0.117)          | 0.000 (0.112)  | 0.001 (0.121)          | 0.000 (0.118)  |
| 60 | 0.000 (0.129)   | -0.002 (0.121) | 0.002 (0.106)          | -0.003 (0.104) | -0.002 (0.113)         | 0.001 (0.108)  |
| 70 | -0.004 (0.120)  | 0.000 (0.114)  | 0.001 (0.101)          | 0.001 (0.098)  | 0.001 (0.104)          | -0.001 (0.101) |
| 80 | -0.002 (0.112)  | 0.000 (0.108)  | 0.001 (0.094)          | 0.000 (0.092)  | 0.000 (0.097)          | -0.001 (0.094) |

Results shown on probability scale

GLS generalised least squares, GEE generalised estimating equations
